# Supplementary material
Source: PubMed Central journal article supplement (PMC3696330)

Mitochondrial inhibitors

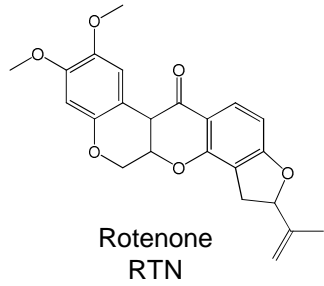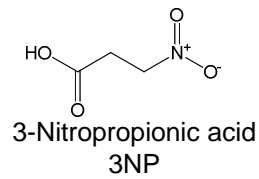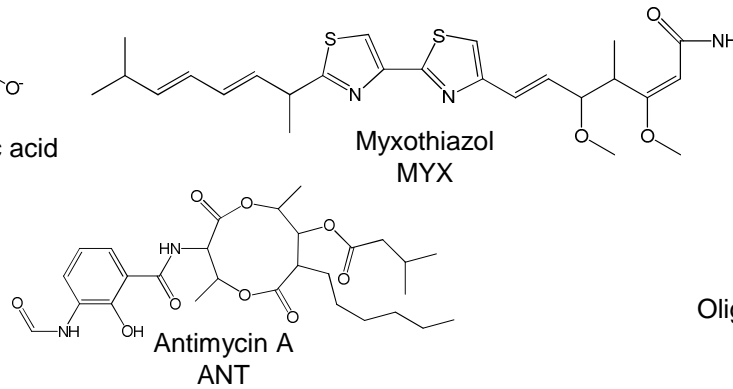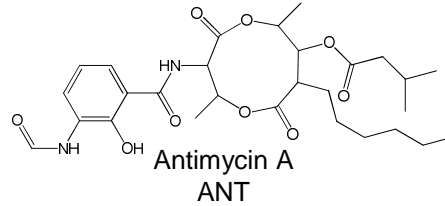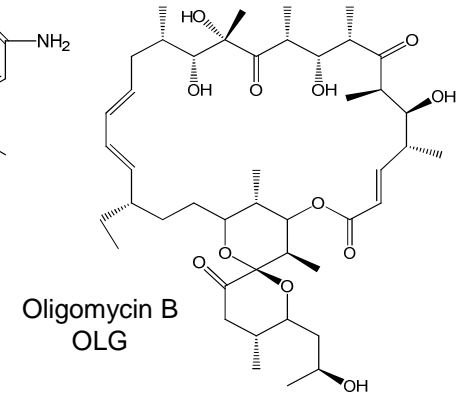

Quinone analogues

Natural monomeric naphthoquinones

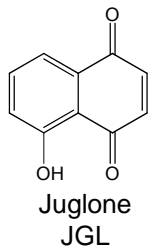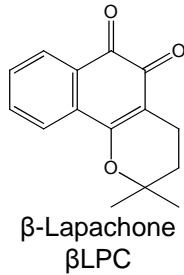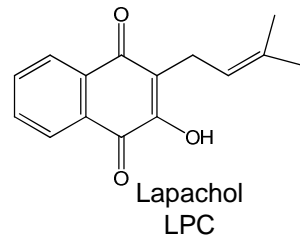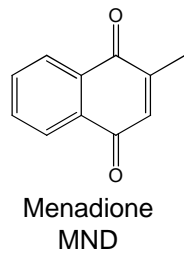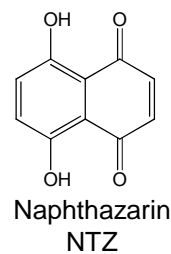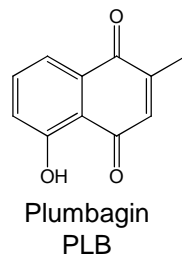

Natural dimeric naphthoquinones

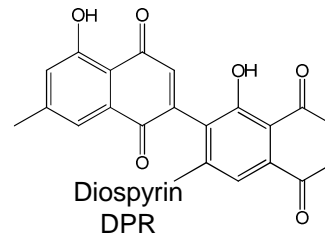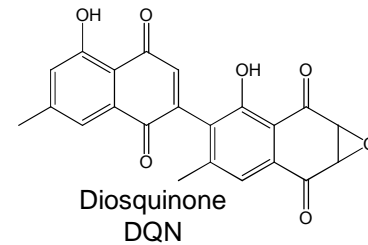

Synthetic naphthoquinone

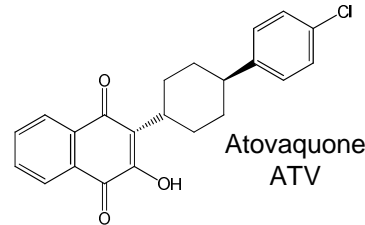

Synthetic benzoquinones

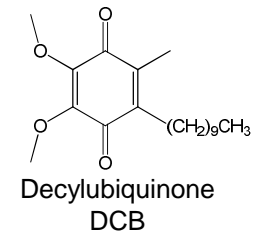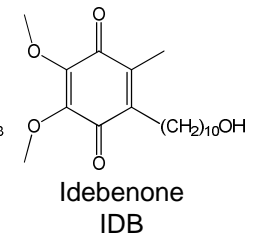

Other drugs

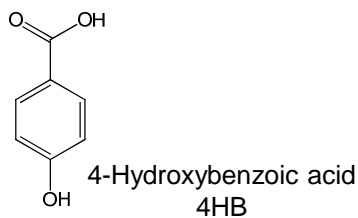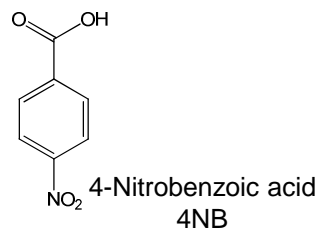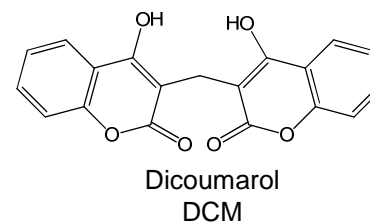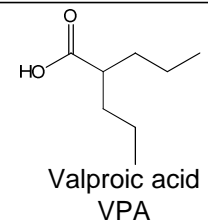

Supplement: bph0169-1072-SD1.pdf [file bph0169-1072-SD1.pdf]
